# Supplementary material
Source: ML conference proceedings conference paper supplement (https://openreview.net/forum?id=9FLkxTGY3B)
Supplement: supplementary_material [file attachment]

## 451 A Related works

452 Answering complex queries on knowledge graphs differs from database query answering by being a  
453 data-driven task [37], where the open-world assumption is addressed by methods that learn from data.  
454 Meanwhile, learning-based methods enable faster neural approximate solutions of symbolic query  
455 answering problems [27].

456 The prevailing way is query embedding, where the computational results are embedded and computed  
457 in the low-dimensional embedding space. Specifically, the query embedding over the set operator trees  
458 is the earliest proposed [13]. The supported set operators include projection[13], intersection [26],  
459 union and negation [28], and later on be improved by various designs [40, 3]. Such methods assume  
460 queries can be converted into the recursive execution of set operations, which imposes additional  
461 assumptions on the solvable class of queries [36]. These assumptions introduce additional limitations  
462 of such query embeddings

463 Recent advancements in query embedding methods adapt query graph representation and graph  
464 neural networks, supporting atomics [21] and negated atomics [35]. Query embedding on graphs  
465 bypasses the assumptions for queries [36]. Meanwhile, other search-based inference methods [2, 39]  
466 are rooted in fuzzy calculus and not subject to the query assumptions [36].

467 Though many efforts have been made, the datasets of complex query answering are usually subject to  
468 the assumptions by set operator query embeddings [36]. Many other datasets are proposed to enable  
469 queries with additional features, see [27] for a comprehensive survey of datasets. However, only one  
470 small dataset proposed by [39] introduced queries and answers beyond such assumptions [36]. It is  
471 questionable that this small dataset is fair enough to justify the advantages claimed in advancement  
472 methods [35, 39] that aim at complex query answering. The dataset [39] is still far away from the  
473 systematical evaluation as [36] and EFO<sub>k</sub>-CQA proposed in this paper fills this gap.

## 474 B Details of constraint satisfaction problem

475 In this section, we introduce the constraint satisfaction problem (CSP) again. One instance of CSP  $\mathcal{P}$   
476 can be represented by a triple  $\mathcal{P} = (X, D, C)$  where  $X = (x_1, \dots, x_n)$  is an  $n$ -tuple of variables,  
477  $D = (D_1, \dots, D_n)$  is the corresponding  $n$ -tuple of domains, meaning for each  $i$ ,  $x_i \in D_i$ . Then,  
478  $C = (C_1, \dots, C_t)$  is  $t$ -tuple constraint, each constraint  $C_i$  is a pair of  $(S_i, R_{S_i})$  where  $S_i$  is called  
479 the scope of the constraint, meaning it is a set of variables  $S_i = \{x_{i_j}\}$  and  $R_{S_i}$  is the constraint over  
480 those variables [29], meaning that  $R_{S_i}$  is a subset of the cartesian product of variables in  $S_i$ .

481 Then the formulation of existential conjunctive formulas as CSP has already been discussed in  
482 Section 2.2. Additionally, for the negation of atomic formula  $\neg r(h, t)$ , we note the constraint  $C$  is  
483 also binary with  $S_i = \{h, t\}$ ,  $R_{S_i} = \{(h, t) | h, t \in \mathcal{E}, (h, r, t) \notin \mathcal{KG}\}$ , this means that  $R_{S_i}$  is a very  
484 large set, thus the constraint is less “strict” than the positive ones.

## 485 C Preliminary of tree form query

486 We explain the operator tree method, as well as the tree-form queries in this section, which is firstly  
487 introduced in [39]. The tree-form queries are defined to be the syntax closure of the operator tree  
488 method and are the prevailing query types in the existing datasets [28, 36], see the definition below:

489 **Definition 17** (Tree-Form Query). *The set of the Tree-Form queries is the smallest set  $\Phi$  such that:*

- 490 (i) *If  $\phi(y) = r(a, y)$ , where  $a \in \mathcal{E}$ , then  $\phi(y) \in \Phi$ ;*
- 491 (ii) *If  $\phi(y) \in \Phi$ ,  $\neg\phi(y) \in \Phi$ ;*
- 492 (iii) *If  $\phi(y), \psi(y) \in \Phi$ , then  $(\phi \wedge \psi)(y) \in \Phi$  and  $(\phi \vee \psi)(y) \in \Phi$ ;*
- 493 (iv) *If  $\phi(y) \in \Phi$  and  $y'$  is any variable, then  $\psi(y') = \exists y.r(y, y') \wedge \phi(y) \in \Phi$ .*

494 We note that the family of tree-form queries deviates from the targeted EFO<sub>1</sub> query family [39]. The  
495 rationale of the definition is that the previous model relied on the representation of “operator tree”

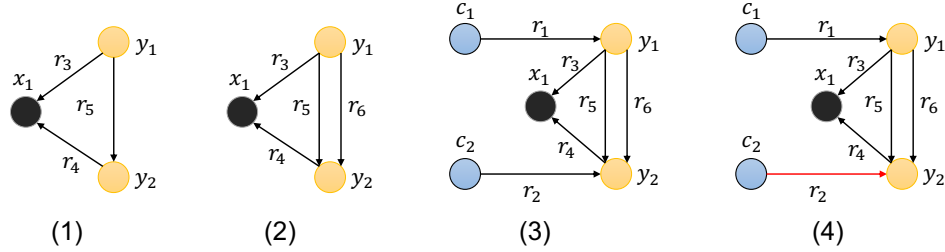

Figure 4: The four steps of enumerating the abstract query graphs. We note that the example and representation follow Figure 3.

496 which addresses logical queries to simulate logical reasoning as the execution of set operators [28, 40,  
 497 38], where each node represents a set of entities corresponding to the answer set of a sub-query [39].  
 498 Then, logical connectives are transformed into operator nodes for set projections(Definition 17 i,iv),  
 499 complement(Definition 17 ii), intersection, and union(Definition 17 iii) [36]. Particularly, the set  
 500 projections are derived from the Skolemization of predicates [24]. Therefore, the operator tree  
 501 method that has been adopted in lines of research [28, 40, 38] is just a model that neuralizes these set  
 502 operations: projection, complement, intersection, and union. These different models basically only  
 503 differ from each other by their parameterization while having the same expressiveness as characterized  
 504 by the tree form query.

505 Specifically, the left side of the Figure 1 shows an example of the operator tree, where “Held” and  
 506 “Located” are treated as two projections, “N” represents set complement, and “I” represents set  
 507 intersection. Therefore, the embedding of the root representing the answer set can be computed based  
 508 on these set operations in a bottom-up manner [28].

509 Finally, it has been noticed that tree-form query is subject to structural traceability and only has  
 510 polynomial time combined complexity for inference while the general  $EFO_k$ , or even  $EFO_1$  queries,  
 511 is NP-complete, with detailed proof in [39]. Therefore, this result highlights the importance of  
 512 investigating the  $EFO_k$  queries as it greatly extends the previous tree-form queries.

## 513 D Construction of the whole $EFO_k$ -CQA dataset

514 In this section, we provide details for the construction of the  $EFO_k$ -CQA dataset.

### 515 D.1 Enumeration of the abstract query graphs

516 We first give a proposition of the property of abstract query graph:

517 **Proposition 18.** *For an abstract query graph  $\mathcal{G}$ , if it conforms Assumption 13 and Assumption 14,*  
 518 *then removing all constant entities in  $\mathcal{G}$  will lead to only one connected component and no edge is*  
 519 *connected between two constant entities.*

520 *Proof.* We prove this by contradiction. If there is an edge (whether positive or negative) between  
 521 constant entities, then this edge is redundant, violating Assumption 13. Then, if there is more than one  
 522 connected component after removing all constant entities in  $\mathcal{G}$ . Suppose one connected component  
 523 has no free variable, then this part is a sentence and thus has a certain truth value, whether 0 or 1,  
 524 which is redundant, violating Assumption 13. Then, we assume every connected component has at  
 525 least one free variable, we assume there is  $m$  connected component and we have:

$$Node(\mathcal{G}) = (\cup_{i=1}^m Node(\mathcal{G}_i)) \cup Node(\mathcal{G}_c)$$

526 where  $m > 1$ , the  $\mathcal{G}_c$  is the set of constant entities and each  $\mathcal{G}_i$  is the connected component, we use  
 527  $Node(\mathcal{G})$  to denote the node set for a graph  $\mathcal{G}$ . Then this equation describes the partition of the node  
 528 set of the original  $\mathcal{G}$ .

529 Then, we construct  $\mathcal{G}_a = G[Node(\mathcal{G}_1) \cup \mathcal{G}_c]$  and  $\mathcal{G}_b = G[(\cup_{i=1}^m Node(\mathcal{G}_i)) \cup Node(\mathcal{G}_c)]$ , where  $G$   
530 represents the induced graph. Then we naturally have that  $\mathcal{A}[I(\mathcal{G})] = \mathcal{A}[I(\mathcal{G}_a)] \times \mathcal{A}[I(\mathcal{G}_b)]$ , where  
531 the  $\times$  represents the Cartesian product, violating Assumption 14.

532 □

533 Additionally, as mentioned in Appendix B, the negative constraint is less “strict”, we formally put an  
534 additional assumption of the real knowledge graph as the following:

535 **Assumption 19.** *For any knowledge graph  $\mathcal{KG}$ , with its entity set  $\mathcal{E}$  and relations set  $\mathcal{R}$ , we assume*  
536 *it is somewhat sparse with regard to each relation, meaning: for any  $r \in \mathcal{R}$ ,  $|\{a \in \mathcal{E} | \exists b. (a, r, b) \in$*   
537  *$\mathcal{KG}$  or  $(b, r, a) \in \mathcal{KG}\}| \ll \mathcal{E}$*

538 Then we develop another proposition for the abstract query graph:

539 **Proposition 20.** *With the knowledge graph conforming Assumption 19, for any node  $u$  in the abstract*  
540 *query graph  $\mathcal{G}$ , if  $u$  is an existential variable or free variable, then it can not only connect with*  
541 *negative edges.*

*Proof.* Suppose  $u$  only connects to  $m$  negative edge  $e_1, \dots, e_m$ . For any grounding  $I$ , we assume  
 $I(e_i) = r_i \in \mathcal{R}$ . For each  $r_i$ , we construct its endpoint set

$$\text{Endpoint}(r_i) = \{a \in \mathcal{E} | \exists b. (a, r, b) \in \mathcal{KG} \text{ or } (b, r, a) \in \mathcal{KG}\}$$

by the assumption 19, we have  $|\text{Endpoint}(r_i)| \ll \mathcal{E}$ , then we have:

$$|\cup_{i=1}^m \text{Endpoint}(r_i)| \leq \sum_{i=1}^m |\text{Endpoint}(r_i)| \ll \mathcal{E}$$

542 since  $m$  is small due to the size of the abstract query graph. Then we have two situations about the  
543 type of node  $u$ :

544 **1.If node  $u$  is an existential variable.**

545 Then we construct a subgraph  $\mathcal{G}_s$  be the induced subgraph of  $Node(\mathcal{G}) - u$ , then for any possible  
546 grounding  $I$ , we prove that  $\mathcal{A}[I(\mathcal{G}_s)] = \mathcal{A}[I(\mathcal{G})]$ , the right is clearly a subset of the left due to it  
547 contains more constraints, then we show every answer of the left is also an answer on the right, we  
548 merely need to give an appropriate candidate in the entity set for node  $u$ , and in fact, we choose any  
549 entity in the set  $\mathcal{E} - \cup_{i=1}^m \text{Endpoint}(r_i)$  since it suffices to satisfies all constraints of node  $u$ , and we  
550 have proved that  $|\mathcal{E} - \cup_{i=1}^m \text{Endpoint}(r_i)| > 0$ .

551 This violates the Assumption 13.

552 **2.If node  $u$  is a free variable.**

553 Similarly, any entity in the set  $\mathcal{E} - \cup_{i=1}^m \text{Endpoint}(r_i)$  will be an answer for the node  $u$ , thus violating  
554 the Assumption 16.

555 □

556 We note the proposition 20 extends the previous requirement about negative queries, which is firstly  
557 proposed in [28] and inherited and named as “bounded negation” in [36], the “bounded negation”  
558 requires the negation operator should be followed by the intersection operator in the operator tree.  
559 Obviously, the abstract query graph that conforms to “bounded negation” will also conform to the  
560 requirement in Proposition 20. A vivid example is offered in Figure 2.

561 Finally, we make the assumption of the distance to the free variable of the query graph:

562 **Assumption 21.** *There is a constant  $d$ , such that for every node  $u$  in the abstract query graph  $\mathcal{G}$ , it*  
563 *can find a free variable in its  $d$ -hop neighbor.*

564 We have this assumption to exclude the extremely long-path queries.

565 Equipped with the propositions and assumptions above, we explore the combinatorial space of the  
566 abstract query graph given certain hyperparameters, including: the max number of free variables,

567 max number of existential variables, max number of constant entities, max number of all nodes, max  
 568 number of all edges, max number of edges surpassing the number of nodes, max number of negative  
 569 edge, max distance to the free variable. In practice, these numbers are set to be: 2, 2, 3, 6, 6, 0, 1, 3.  
 570 We note that the max number of edges surpassing the number of nodes is set to 0, which means that  
 571 the query graph can at most have one more edge than a simple tree, thus, we exclude those query  
 572 graphs that are both cyclic graphs and multigraphs, making our categorization and discussion in the  
 573 experiments in Section 5.2 and Section 5.3 much more straightforward and clear.

574 Then, we create the abstract query graph by the following steps, which is a graph with three types of  
 575 nodes and two kinds of edges:

- 576 1. First, create a simple connected graph  $\mathcal{G}_1$  with two types of nodes, the existential variable  
 577 and the free variable, and one type of edge, the positive edge.
- 578 2. We add additional edges to the simple graph  $\mathcal{G}_1$  and make it a multigraph  $\mathcal{G}_2$ .
- 579 3. Then, the constant variable is added to the graph  $\mathcal{G}_2$ . In this step, we make sure not too long  
 580 existential leaves. The result is graph  $\mathcal{G}_3$ .
- 581 4. Finally, random edges in  $\mathcal{G}_3$  are replaced by the negation edge, and we get the final abstract  
 582 query graph  $\mathcal{G}_4$ .

583 In this way, all possible query graphs within a certain combinatorial space are enumerated, and finally,  
 584 we filter duplicated graphs with the help of the graph isomorphism algorithm. We give an example to  
 585 illustrate the four-step construction of an abstract query graph in Figure 4.

## 586 D.2 Ground abstract query graph with meaningful negation

587 To fulfill the Assumption 15 as discussed in Section 4.2, for an abstract query graph  $\mathcal{G} = (V, E, f, g)$ ,  
 588 we have two steps: (1). Sample grounding for the positive subgraph  $\mathcal{G}_p$  and compute its answer (2).  
 589 Ground the  $\mathcal{G}_n$  to decrease the answer got in the first step. Then we define positive subgraph  $\mathcal{G}_p$   
 590 to be defined as such, its edge set  $E' = \{e \in E | g(e) = \text{positive}\}$ , its node set  $V' = \{u | u \in V, \exists e \in$   
 591  $E' \text{ and } e \text{ connects to } u\}$ . Then  $\mathcal{G}_p = (V', E', f, g)$ . We note that because of Proposition 20, if a node  
 592  $u \in V - V'$ , then we know node  $u$  must be a constant entity.

593 Then we sample the grounding for the positive subgraph  $\mathcal{G}_p$ , we also compute the CSP answer  $\bar{\mathcal{A}}_p$  for  
 594 this subgraph.

595 Then we ground what is left in the positive subgraph, we split each negative edge in  $E - E'$  into two  
 596 categories:

- 597 **1. This edge  $e$  connects two nodes  $u, v$ , and  $u, v \in V'$ .**

598 In this case, we sample the relation  $r$  to be the grounding of  $e$  such that it negates some of the answers  
 599 in  $\bar{\mathcal{A}}_p$ .

- 600 **2. This edge  $e$  connects two nodes  $u, v$ , where  $u \in V'$ , while  $v \notin V'$ .**

601 In this case, we sample the relation  $r$  for  $e$  and entity  $a$  for  $v$  such that they negate some answer in  
 602  $\bar{\mathcal{A}}_p$ , we note we only need to consider the possible candidates for node  $u$  and it is quite efficient.

603 We note that there is no possibility that neither of the endpoints is in  $V'$  because as we have discussed  
 604 above, this means that both nodes are constant entities, but in Proposition 18 we have asserted that no  
 605 edge is connected between two entities.

## 606 D.3 The comparison to previous benchmark

607 To give an intuitive comparison of our EFO<sub>k</sub>-CQA dataset against those previous datasets and  
 608 benchmark, including the BetaE dataset in [28], the EFO-1-QA benchmark [36] that extends BetaE  
 609 dataset, and the FIT dataset in [39] that explores 10 more new query types, we offer a new figure in  
 610 Figure 5.

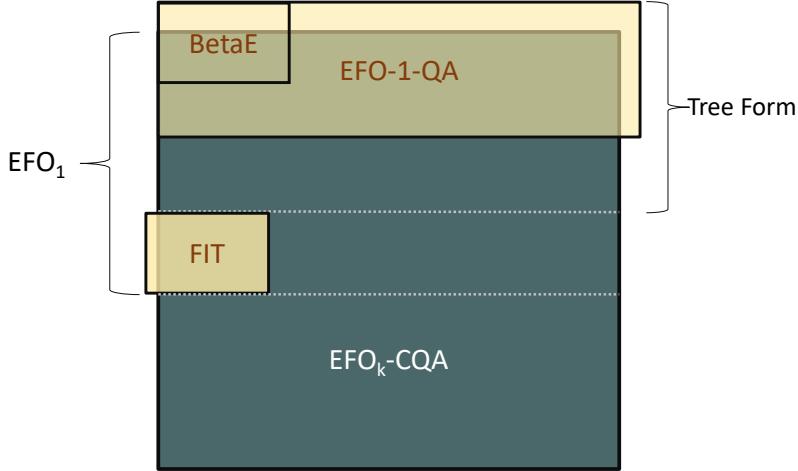

Figure 5: Illustration of the comparison between the  $EFO_k$ -CQA dataset (navy blue box) and the previous dataset (three yellow boxes), where the BetaE and EFO-1-QA aim to investigate the tree form query, explained in Appendix C, while the FIT dataset aims to investigate  $EFO_1$  query that is not tree form. FIT is not a subset of  $EFO_k$ -CQA because its “3pm” query is not included in  $EFO_k$ -CQA.

611 It can be clearly observed that EFO-1-QA covers the BetaE dataset and has provided a quite systematic  
 612 investigation in tree form query, while FIT deviates from them and studies ten new query types that  
 613 are in  $EFO_1$  but not tree form.

614 As discussed in Section 3, the scope of the formula investigated in our  $EFO_k$ -CQA dataset surpasses  
 615 the previous EFO-1-QA benchmark and FIT dataset because of three reasons: (1). We include  
 616 the  $EFO_k$  formula with multiple free variables that has never been investigated (the bottom part of  
 617 navy blue box in Figure 5); (2). We systematically investigate those  $EFO_1$  queries that are not tree  
 618 form while the previous FIT dataset only discusses ten hand-crafted query types (the navy blue part  
 619 between two white lines in Figure 5); (3) Our assumption is more systematic than previous ones as  
 620 shown by the example in Figure 2 (the top navy blue part above two white lines in Figure 5). Though  
 621 we only contain 741 query types while the EFO-1-QA benchmark contains 301 query types, we list  
 622 reasons for the number of query types is not significantly larger than the previous benchmark: (1).  
 623 EFO-1-QA benchmark relies on the operator tree that contains union, which represents the logic  
 624 conjunction ( $\vee$ ), however, we only discuss the conjunctive queries because we always utilize the  
 625 DNF of a query. We notice that there are only 129 query types in EFO-1-QA without the union,  
 626 significantly smaller than the  $EFO_k$ -CQA dataset. (2). In the construction of  $EFO_k$ -CQA dataset,  
 627 we restrict the query graph to have at most one negative edge to avoid the total number of query types  
 628 growing quadratically, while in EFO-1-QA benchmark, their restrictions are different than ours and it  
 629 contains queries that have two negative atomic formulas as indicated by the right part of yellow box  
 630 is not contained in the navy blue box.

#### 631 D.4 $EFO_k$ -CQA statistics

632 The statistics of our  $EFO_k$ -CQA dataset are shown in Table 3 and Table 4, they show the statistics  
 633 of our abstract query graph by their topology property, the statistics are split into the situation that  
 634 the number of free variable  $k = 1$  and the number of free variable  $k = 2$ , correspondingly. We  
 635 note abstract query graphs with seven nodes have been excluded as the setting of hyperparameters  
 636 discussed in Appendix D.1, we make these restrictions to control the quadratic growth in the number  
 637 of abstract query graphs.

638 Finally, in FB15k-237, we sample 1000 queries for an abstract query graph without negation, 500  
 639 queries for an abstract query graph with negation; in FB15k, we sample 800 queries for an abstract

Table 3: The number of abstract query graphs with one free variable. We denote  $e$  as the number of existential variables and  $c$  as the number of constant entities. SDAG represents the Simple Directed Acyclic Graph, Multi for multigraph, and Cyclic for the cyclic graph. Sum.( $c$ ) and Sum.( $e$ ) is the total number of queries with the number of constant entities / existential variables fixed.

| $c \backslash e$ | 0    |      |       | 1    |       |        | 2    |       |        | Sum.( $c$ ) | Sum. |
|------------------|------|------|-------|------|-------|--------|------|-------|--------|-------------|------|
|                  | SDAG | SDAG | Multi | SDAG | Multi | Cyclic | SDAG | Multi | Cyclic |             |      |
| 1                | 1    | 2    | 4     | 4    | 16    | 4      | 31   |       |        |             |      |
| 2                | 2    | 6    | 6     | 20   | 40    | 8      | 82   |       |        | 251         |      |
| 3                | 2    | 8    | 8     | 36   | 72    | 12     | 138  |       |        |             |      |
| Sum.( $e$ )      | 5    | 16   | 18    | 60   | 128   | 24     |      |       |        |             |      |

Table 4: The number of abstract query graphs with two free variables. The notation of  $e$ ,  $c$  SDAG, Multi, and Cyclic are the same as Table 3. And "-" means that this type of abstract query graph is not included.

| $c \backslash e$ | $e = 0$ |       | $e = 1$ |       |        | $e = 2$ |       |        | AVG. |
|------------------|---------|-------|---------|-------|--------|---------|-------|--------|------|
|                  | SDAG    | Multi | SDAG    | Multi | Cyclic | SDAG    | Multi | Cyclic |      |
| $c = 1$          | 1       | 2     | 7       | 18    | 4      | 6       | 32    | 26     | 96   |
| $c = 2$          | 4       | 4     | 20      | 36    | 8      | 38      | 108   | 64     | 282  |
| $c = 3$          | 4       | 4     | 32      | 60    | 12     | -       | -     | -      | 112  |

640 query graph without negation, 400 queries for an abstract query graph with negation; in NELL,  
 641 we sample 400 queries for an abstract query graph without negation, 100 queries for an abstract  
 642 query graph with negation. As we have discussed in Appendix D.2, sample negative query is  
 643 computationally costly, thus we sample less of them.

## 644 E Evaluation details

645 We explain the evaluation protocol in detail for Section 4.5.

646 Firstly, we explain the computation of common metrics, including Mean Reciprocal Rank(MRR) and  
 647 HIT@K, given the full answer  $\mathcal{A}$  in the whole knowledge graph and the observed answer  $\mathcal{A}_o$  in the  
 648 observed knowledge graph, we focus on the hard answer  $\mathcal{A}_h$  as it requires more than memorizing the  
 649 observed knowledge graph and serves as the indicator of the capability of reasoning.

650 Specifically, we rank each hard answer  $a \in \mathcal{A}_h$  against all non-answers  $\mathcal{E} - \mathcal{A} - \mathcal{A}_o$ , the reason is  
 651 that we need to neglect other answers so that answers do not interfere with each other, finally, we get  
 652 the ranking for  $a$  as  $r$ . Then its MRR is  $1/r$ , and its HIT@k is  $\mathbf{1}_{r \leq k}$ , thus, the score of a query is the  
 653 mean of the scores of every its hard answer. We usually compute the score for a query type (which  
 654 corresponds to an abstract query graph) as the mean score of every query within this type.

655 As the marginal score and the multiply score have already been explained in Section 4.5, we only  
 656 mention one point that it is possible that every free variable does not have marginal hard answer.  
 657 Assume that for a query with two free variables, its answer set  $\mathcal{A} = \{(a_1, a_2), (a_1, a_3), (a_4, a_2)\}$  and  
 658 its observed answer set  $\mathcal{A}_o = \{(a_1, a_3), (a_4, a_2)\}$ . In this case,  $a_1$  is not the marginal hard answer for  
 659 the first free variable and  $a_2$  is not the marginal hard answer for the second free variable, in general,  
 660 no free variable has its own marginal hard answer.

661 Then we only discuss the joint metric, specifically, we only explain how to estimate the joint ranking  
 662 by the individual ranking of each free variable. For each possible  $k$ -tuple  $(a_1, \dots, a_k)$ , if  $a_i$  is ranked  
 663 as  $r_i$  among the **whole** entity set  $\mathcal{E}$ , we compute the score of this tuple as  $\sum_{i=1}^k r_i$ , then we sort  
 664 the whole  $\mathcal{E}^k$   $k$ -tuple by their score, for the situation of a tie, we just use the lexicographical order.  
 665 After the whole joint ranking is got, we use the standard evaluation protocol that ranks each hard

---

**Algorithm 1** Embedding computation on the query graph.

---

**Require:** The query graph  $G$ .

Compute the ordering of the nodes as explained in Algorithm 2.

Create a dictionary  $E$  to store the embedding for each node in the query graph

**for**  $i \leftarrow 1$  to  $n$  **do**

**if** node  $u_i$  is a constant entity **then**

    The embedding of  $u_i$ ,  $E[i]$  is gotten from the entity embedding

**else**

    Then we know node  $u_i$  is either free variable or existential variable

    Compute the set of nodes  $\{u_{i_j}\}_{j=1}^t$  that are previous to  $i$  and adjacency to node  $u_i$ .

    Create a list to store projection embedding  $L$ .

**for**  $j \leftarrow 1$  to  $t$  **do**

      Find the relation  $r$  between node  $u_i$  and  $u_{i_j}$ , get the embedding of node  $u_{i_j}$  as  $E[i_j]$ .

**if**  $E[i_j]$  is not None **then**

**if** The edge between  $u_i$  and  $u_{i_j}$  is positive **then**

          Compute the embedding of projection( $E[i_j], r$ ), add it to the list  $L$ .

**else**

          Compute the embedding of the negation of the projection( $E[i_j], r$ ), add it to the list  $L$ .

**end if**

**end if**

**end for**

**if** The list  $L$  has no element **then**

$E[i]$  is set to none.

**else if** The list  $L$  has one element **then**

$E[i] = L[0]$

**else**

      Compute the embedding as the intersection of the embedding in the list  $L$ , and set  $E[i]$  as the outcome.

**end if**

**end if**

**end for**

**return** The embedding dictionary  $E$  for each node in the query graph.

---

666 answer against all non-answers. It can be confirmed that this estimation method admits a closed-form  
667 solution for the sorting in  $\mathcal{E}^k$  space, thus the computation cost is affordable.

668 We just give the closed-form solution when there are two free variables:

669 for the tuple  $(r_1, r_2)$ , the possible combinations that sum less than  $r_1 + r_2$  is  $\binom{r_1+r_2-1}{2}$ , then, there  
670 is  $r_1 - 1$  tuple that ranks before  $(r_1, r_2)$  because of lexicographical order, thus, the final ranking for  
671 the tuple  $(r_1, r_2)$  is just  $\binom{r_1+r_2-1}{2} + r_1$  that can be computed efficiently.

## 672 F Implementation details of CQA models

673 In this section, we provide implementation details of CQA models that have been evaluated in our  
674 paper. For query embedding methods that rely on the operator tree, including BetaE [28], LogicE [24],  
675 and ConE [40], we compute the ordering of nodes in the query graph in Algorithm 2, then we compute  
676 the embedding for each node in the query graph Algorithm 1, the final embedding of every free  
677 node are gotten to be the predicted answer. Especially, the node ordering we got in Algorithm 2  
678 coincides with the natural topology ordering induced by the directed acyclic operator tree, so we can  
679 compute the embedding in the same order as the original implementation. Then, in Algorithm 1, we  
680 implement each set operation in the operator tree, including intersection, negation, and set projection.  
681 By the merit of the Disjunctive Normal Form (DNF), the union is tackled in the final step. Thus, our  
682 implementation can coincide with the original implementation in the original dataset [28].

---

**Algorithm 2** Node ordering on the abstract query graph.

---

**Require:** The abstract query graph  $\mathcal{G} = (V, E, f, g)$ ,  $V$  consists  $m$  nodes,  $u_1, \dots, u_m$ .  
Creates an empty list  $L$  to store the ordering of the node.  
Creates another two set  $S_1$  and  $S_2$  to store the nodes that are to be explored next.

```
for  $i \leftarrow 1$  to  $m$  do
  if The type of node  $f(u_i)$  is constant entity then
    list  $L$  append the node  $u_i$ 
  for Node  $u_j$  that connects to  $u_i$  do
    if  $f(u_j)$  is existential variable then
       $u_j$  is added to set  $S_1$ 
    else
       $u_j$  is added to set  $S_2$ 
    end if
  end for
end if
while Not all node is included in  $L$  do
  if Set  $S_1$  is not empty then
    We sort the set  $S_1$  by the sum of their distance to every free variable in  $\mathcal{G}$ , choose the most
    remote one, and if there is a tie, randomly choose one node,  $u_i$  to be the next to explore.
    We remove  $u_i$  from set  $S_1$ .
  else
    In this case, we know set  $S_2$  is not empty because of the connectivity of  $\mathcal{G}$ .
    We randomly choose a node  $u_i \in S_2$  to be the next node to explore.
    We remove  $u_i$  from set  $S_2$ .
  end if
  for Node  $u_j$  that connects to  $u_i$  do
    if  $f(u_j)$  is existential variable then
       $u_j$  is added to set  $S_1$ 
    else
       $u_j$  is added to set  $S_2$ 
    end if
  end for
  List  $L$  append the node  $u_i$ 
end while
end for
return The list  $L$  as the ordering of nodes in the whole abstract query graph  $\mathcal{G}$ 
```

---

683 For CQD [2] and LMPNN [35], their original implementation does not require the operator tree, so  
684 we just use their original implementation. Specifically, in a query graph with multiple free variables,  
685 for CQD we predict the answer for each free variable individually as taking others free variables as  
686 existential variables, for LMPNN, we just got all embedding of nodes that represent free variables.

687 For FIT [39], though it is proposed to solve EFO<sub>1</sub> queries, it is computationally costly: it has a  
688 complexity of  $O(\mathcal{E}^2)$  in the acyclic graphs and is even not polynomial in the cyclic graphs, the  
689 reason is that FIT degrades to enumeration to deal with cyclic graph. In our implementation, we  
690 further restrict FIT to at most enumerate 10 possible candidates for each node in the query graph, this  
691 practice has allowed FIT to be implemented in the dataset FB15k-237 [32]. However, it cost 20 hours  
692 to evaluate FIT on our EFO<sub>k</sub>-CQA dataset while other models only need no more than two hours.  
693 Moreover, for larger knowledge graph, including NELL [7] and FB15k [5], we have also encountered  
694 an out-of-memory error in a Tesla V100 GPU with 32G memory when implementing FIT, thus, we  
695 omit its result in these two knowledge graphs.

## 696 G Further outlook to more complex query answering

697 In this section, we discuss possible further development in the task of complex query answering and  
698 how our work, especially our framework proposed in Section 4 can help with future development.



699 We list some new features that may be of interest and show the maximum versatility our framework  
700 can reach. Our analysis and characterization of future queries inherit the outlook in [37] and also is  
701 based on the current development.

702 **Inductive Reasoning** Inductive reasoning is a new trend in the field of complex query answering.  
703 Some entities [9] or even relations [15] are not seen in the training period, namely they can not be  
704 found by the observed knowledge graph  $\mathcal{G}_o$  therefore, the inductive generalization is essential for the  
705 model to infer answers. We note that our framework is powerful enough to sample inductive queries  
706 with the observed knowledge graph  $\mathcal{G}_o$  given. Therefore, the functionality of sampling inductive  
707 query is already contained and implemented in our framework, see <https://anonymous.4open.science/r/EFOK-CQA/README.md>.

709 **N-ary relation** N-ary relation is a relation that has  $n > 2$  corresponding entities, therefore, the factual  
710 information in the knowledge graph is not a triple but a  $(n + 1)$ -tuple. Moreover, the query graph is  
711 also a hypergraph, making the corresponding CSP problem even harder. This is a newly introduced  
712 topic [23, 1] in complex query answering, which our framework has limitations in representing.

713 **Knowledge graph with attribute** Currently, there has been some research that has taken the  
714 additional attribute of the knowledge graph into account. Typical attributes include entity types [14],  
715 numerical literals [4], triple timestamps [16, 30], and triple probabilities [7]. We note that attributes  
716 expand the entity set  $\mathcal{E}$  from all entities to entities with attribute values, it is also possible that the  
717 relation set  $\mathcal{R}$  is also extended to contain corresponding relations, like “greater”, “less” when dealing  
718 with numerical literals. Then, our framework can represent queries on such extended knowledge  
719 graphs like in [4], where no function like “plus”, or “minus” is considered and the predicates are also  
720 binary.

721 Overall, our framework can be applied to some avant-garde problem settings given certain properties,  
722 thus those functionalities proposed in Section 4 can be useful. We hope our discussion helps with the  
723 future development of complex query answering.

## 724 H Additional experiment result and analysis

725 In this section, we offer another experiment result not available to be shown in the main paper. For the  
726 purpose of supplementation, we select some representative experiment result as the experiment result  
727 is extremely complex to be categorized and be shown. we present the further benchmark result of the  
728 following: [the analysis of benchmark result in detail, more than just the averaged score in Table 1 and Table 2, which is provided in Appendix H.1](#); result of different knowledge graphs, including NELL  
730 and FB15k, which is provided in Appendix H.2 and H.3, the situation of more constant entities since  
731 we only discuss when there are two constant entities in Table 2, the result is provided in Appendix H.4,  
732 and finally, all queries(including the queries without marginal hard answers), in Appendix H.5.

733 We note that we have explained in Section 4.5 and Appendix E that for a query with multiple free  
734 variables, some or all of the free variables may not have their marginal hard answer and thus the  
735 marginal metric can not be computed. Therefore, in the result shown in Table 2 in Section 5.3, we  
736 only conduct evaluation on those queries that both of their free variables have marginal hard answers,  
737 and we offer the benchmark result of all queries in Appendix H.5 where only two kinds of metrics  
738 are available.

### 739 H.1 Further result and analysis of the experiment in main paper

740 To supplement the experiment result already shown in Section 5.2 and Section 5.3, we have included  
741 more benchmark results in this section. Though the averaged score is a broadly-used statistic to  
742 benchmark the model performance on our EFO $_k$  queries, this is not enough and we have offered  
743 much more detail in this section.

744 **Whole combinatorial space helps to develop trustworthy machine learning models.** Firstly, we  
745 show more detailed benchmark results of the relative performance between our selected six CQA

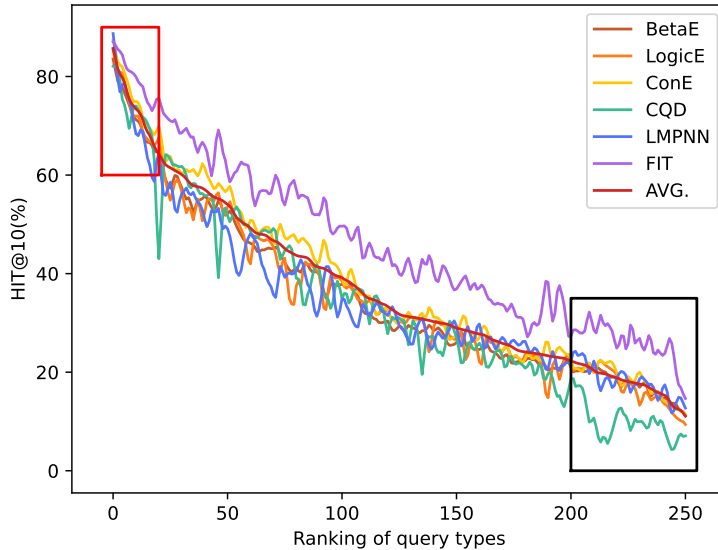

Figure 6: Relative performance of the six representative CQA models in referring queries with one free variable, where the ranking of query types is determined by the average HIT@10 score. A Gaussian filter with sigma=1 is added to smooth the curve. We also use the red box to highlight the easiest queries and the black box to highlight the most challenging ones.

746 models, the result is shown in Table 6. Specifically, we plot two boxes, the black one, including the  
 747 most difficult query types, and the red box, including the easiest query types. In the easiest part, we  
 748 find that even the worst model and the best model have pretty similar performance despite that they  
 749 may differ greatly in other query types. The performance in the most difficult query types is more  
 750 important when the users are risk-sensitive and desire a trustworthy machine-learning model that  
 751 does not crash in extreme cases [33] and we highlight it in the black box. In the black box, we note  
 752 that CQD [2], though designed in a rather general form, is pretty unstable when comes to empirical  
 753 evaluation, as it has a clear downward curve and deviates from other model’s performance enormously  
 754 in the most difficult query types. Therefore, though its performance is better than LMPNN and  
 755 comparable to BetaE on average as reported in 1, its unsteady performance suggests its inherent  
 756 weakness. On the other hand, ConE [40] is much more steady and outperforms BetaE and LogicE  
 757 consistently. We also show the result when there are two free variables in Figure 7, where the model  
 758 performance is much less steady but the trend is similar to the  $EFO_1$  case in general.

759 **Empirical hardness of query types and incomplete discussion of the previous dataset.** Moreover,  
 760 we also discuss the empirical hardness of query types themselves and compare different datasets  
 761 accordingly in Figure 8. We find the standard deviation of the six representative CQA models  
 762 increases in the most difficult part and decreases in the easiest part, corroborating our discussion in  
 763 the first paragraph. We also highlight those query types that have already been investigated in BetaE  
 764 dataset [28] and FIT dataset [39]. We intuitively find that the BetaE dataset does not include very  
 765 challenging query types while the FIT dataset mainly focuses on them. This can be explained by the  
 766 fact that nine out of ten most challenging query types correspond to multigraph, which the BetaE  
 767 dataset totally ignores while the FIT dataset highlights it as a key feature. To give a quantitative  
 768 analysis of whether their hand-crafted query types are sampled from the whole combinatorial space,  
 769 we have adopted the Kolmogorov–Smirnov test to test the distribution discrepancy between their  
 770 distribution and the query type distribution in  $EFO_k$ -CQA since  $EFO_k$ -CQA enumerates all possible  
 771 query types in the given combinatorial space and is thus unbiased. We find that the BetaE dataset  
 772 is indeed generally easier and its p-value is 0.78, meaning that it has a 78 percent possibility to be

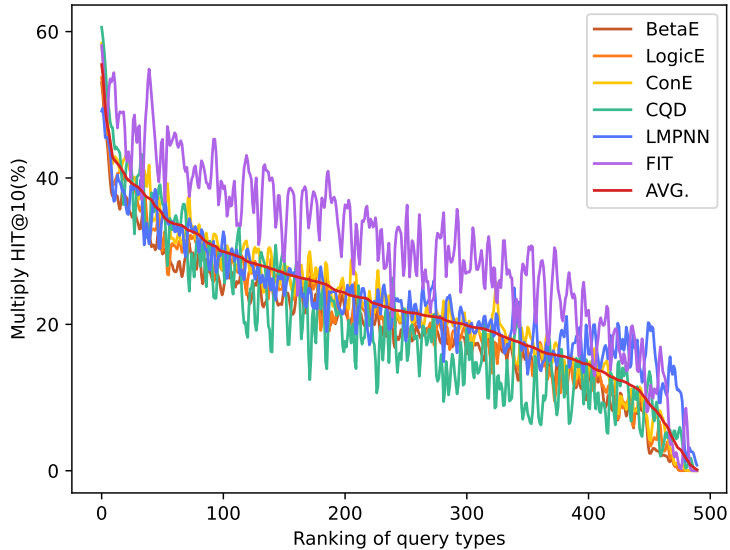

Figure 7: Relative performance of the six representative CQA models in referring queries with two free variables, the ranking of query types is determined by the average Multiply HIT@10 score. A Gaussian filter with  $\sigma=1$  is added to smooth the curve.

773 unbiased, while the FIT dataset is significantly harder and its p-value is 0.27. Therefore, there is  
 774 no significant statistical evidence to prove they are sampled from the whole combinatorial space  
 775 unbiasedly.

## 776 H.2 Further benchmark result of $k=1$

777 Firstly, we present the benchmark result when there is only one free variable, since the result in  
 778 FB15k-237 is provided in Table 1, we provide the result for other standard knowledge graphs, FB15k  
 779 and NELL, their result is shown in Table 6 and Table 7, correspondingly. We note that FIT is out  
 780 of memory with the two large graphs FB15k and NELL as explained in Appendix F and we do  
 781 not include its result. As FB15k and NELL are both reported to be easier than FB15k-237, the  
 782 models have better performance. The trend and analysis are generally similar to our discussion in  
 783 Section 5.2 with some minor, unimportant changes that LogicE [24] has outperformed ConE [40] in  
 784 the knowledge graph NELL, indicating one model may not perform identically well in all knowledge  
 785 graphs.

## 786 H.3 Further benchmark result for $k=2$ in more knowledge graphs

787 Then, similar to Section 5.3, we provide the result for other standard knowledge graphs, FB15k and  
 788 NELL, when the number of constant entities is fixed to two, their result is shown in Table 8 and  
 789 Table 9, correspondingly.

790 We note that though in some breakdowns, the marginal score is over 90 percent, almost close to 100  
 791 percent, the joint score is pretty slow, which further corroborates our findings that joint metric is  
 792 significantly harder and more challenging in Section 5.3.

## 793 H.4 Further benchmark result for $k=2$ with more constant numbers.

794 As the experiment in Section 5.3 only contains the situation where the number of constant entity is  
 795 fixed as one, we offer the further experiment result in Table 10.

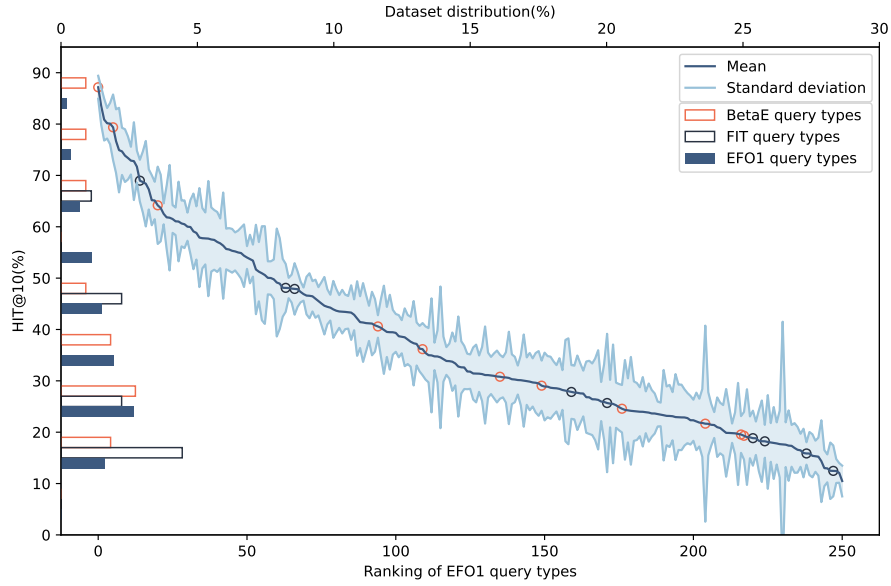

Figure 8: Query type distribution in three different datasets, BetaE one, FIT one, and the EFO<sub>1</sub> part in our EFO<sub>k</sub>-CQA dataset. The left part shows the histogram that represents the probability density function of each dataset. The ranking of query types is also determined by the mean HIT@10 score as in Figure 6, with the standard deviation of the performance of the six CQA models shown as the light blue error bar.

796 The result shows that models perform worse with fewer constant variables when compares to the  
 797 result in Table 2, this observation is the same as the previous result with one free variable that has  
 798 been discussed in Section 5.2.

### 799 H.5 Further benchmark result for $k=2$ including all queries

800 Finally, as we have explained in Section 4.5 and Appendix E, there are some valid EFO<sub>k</sub> queries  
 801 without marginal hard answers when  $k > 1$ . Thus, there is no way to calculate the marginal scores,  
 802 all our previous experiments are therefore only conducted on those queries that all their free variables  
 803 have marginal hard answers. In this section, we only present the result of the Multiply and Joint score,  
 804 as they can be computed for any valid EFO<sub>k</sub> queries, and therefore this experiment is conducted on  
 805 the whole EFO<sub>k</sub>-CQA dataset.

806 We follow the practice in Section 5.3 that fixed the number of constant entities as two, as the impact  
 807 of constant entities is pretty clear, which has been further corroborated in Appendix H.4. The  
 808 experiments are conducted on all three knowledge graphs, FB15k-237, FB15k, and NELL, the result  
 809 is shown in Table 11, Table 12, and Table 13, correspondingly.

810 Interestingly, comparing the result in Table 2 and Table 11, the multiple scores actually increase  
 811 through the joint scores are similar. This may be explained by the fact that if one free variable has no  
 812 marginal hard answer, then it can be easily predicted, leading to a better performance for the whole  
 813 query.

Table 5: MRR scores(%) for inferring queries with one free variable on FB15k-237. We denote  $e$  as the number of existential variables and  $c$  as the number of constant entities. SDAG represents the Simple Directed Acyclic Graph, Multi for multigraph, and Cyclic for the cyclic graph.  $AVG.(c)$  and  $AVG.(e)$  is the average score of queries with the number of constant entities / existential variables fixed.

| Model  | $c \backslash e$ | 0           |             |             | 1           |             |             | 2           |       |             | AVG.(c) | AVG. |
|--------|------------------|-------------|-------------|-------------|-------------|-------------|-------------|-------------|-------|-------------|---------|------|
|        |                  | SDAG        | SDAG        | Multi       | SDAG        | Multi       | Cyclic      | SDAG        | Multi | Cyclic      |         |      |
| BetaE  | 1                | 16.2        | 17.9        | 10.9        | 10.6        | 8.5         | 16.5        | 11.1        |       |             |         |      |
|        | 2                | 35.6        | 20.2        | 19.1        | 15.7        | 15.7        | 27.1        | 17.8        |       | 20.7        |         |      |
|        | 3                | 53.3        | 32.4        | 33.1        | 21.7        | 21.6        | 37.4        | 24.8        |       |             |         |      |
|        | AVG.(e)          | 37.4        | 25.7        | 23.5        | 18.8        | 18.1        | 30.5        |             |       |             |         |      |
| LogicE | 1                | 17.4        | 19.0        | 11.5        | 11.0        | 8.5         | 16.8        | 11.5        |       |             |         |      |
|        | 2                | 36.7        | 21.2        | 19.8        | 16.5        | 16.1        | 27.3        | 18.4        |       | 21.3        |         |      |
|        | 3                | 55.5        | 34.6        | 34.5        | 22.3        | 22.0        | 37.5        | 25.4        |       |             |         |      |
|        | AVG.(e)          | 38.9        | 27.3        | 24.5        | 19.4        | 18.5        | 30.6        |             |       |             |         |      |
| ConE   | 1                | 18.6        | 19.9        | 11.8        | 11.4        | 9.3         | 18.7        | 12.3        |       |             |         |      |
|        | 2                | 39.1        | 22.4        | 20.8        | 18.1        | 17.6        | 30.7        | 20.1        |       | 23.1        |         |      |
|        | 3                | 58.8        | 36.4        | 37.0        | 24.6        | 23.8        | 41.7        | 27.6        |       |             |         |      |
|        | AVG.(e)          | 41.4        | 28.7        | 26.0        | 21.3        | 20.1        | 34.2        |             |       |             |         |      |
| CQD    | 1                | <b>22.2</b> | 19.5        | 9.0         | 9.2         | 6.4         | 15.6        | 10.0        |       |             |         |      |
|        | 2                | 35.3        | 20.1        | 19.1        | 16.4        | 16.2        | 27.6        | 18.4        |       | 21.9        |         |      |
|        | 3                | 40.3        | 32.9        | 34.3        | 24.4        | 24.0        | 40.2        | 26.8        |       |             |         |      |
|        | AVG.(e)          | 33.9        | 26.2        | 23.7        | 20.5        | 19.4        | 31.9        |             |       |             |         |      |
| LMPNN  | 1                | 20.5        | 21.4        | 11.2        | 11.6        | 8.7         | 17.0        | 11.9        |       |             |         |      |
|        | 2                | 42.0        | 22.6        | 18.5        | 16.5        | 14.9        | 26.5        | 17.9        |       | 20.5        |         |      |
|        | 3                | 62.3        | 35.9        | 31.6        | 22.1        | 19.8        | 35.5        | 24.0        |       |             |         |      |
|        | AVG.(e)          | 44.2        | 28.8        | 22.7        | 19.4        | 16.9        | 29.4        |             |       |             |         |      |
| FIT    | 1                | <b>22.2</b> | <b>25.0</b> | <b>17.4</b> | <b>13.9</b> | <b>11.7</b> | <b>23.3</b> | <b>15.6</b> |       |             |         |      |
|        | 2                | <b>45.3</b> | <b>29.6</b> | <b>28.5</b> | <b>23.8</b> | <b>24.3</b> | <b>35.5</b> | <b>26.5</b> |       | <b>30.3</b> |         |      |
|        | 3                | <b>64.5</b> | <b>44.8</b> | <b>45.4</b> | <b>33.3</b> | <b>33.5</b> | <b>44.4</b> | <b>36.2</b> |       |             |         |      |
|        | AVG.(e)          | <b>46.7</b> | <b>36.2</b> | <b>33.6</b> | <b>28.6</b> | <b>27.9</b> | <b>37.9</b> |             |       |             |         |      |

Table 6: MRR scores(%) for inferring queries with one free variable on FB15k. The notation of  $e$ ,  $c$ , SDAG, Multi, Cyclic, AVG.( $c$ ) and AVG.( $e$ ) are the same as Table 1.

| Model  | $c \backslash e$ | 0    |      |       | 1    |       |        | 2    |       |        | AVG.( $c$ ) | AVG. |
|--------|------------------|------|------|-------|------|-------|--------|------|-------|--------|-------------|------|
|        |                  | SDAG | SDAG | Multi | SDAG | Multi | Cyclic | SDAG | Multi | Cyclic |             |      |
| BetaE  | 1                | 38.6 | 30.4 | 29.2  | 21.7 | 21.7  | 24.1   | 24.3 | 34.0  |        |             |      |
|        | 2                | 49.7 | 34.0 | 37.2  | 28.3 | 29.2  | 35.5   | 31.0 |       |        |             |      |
|        | 3                | 63.5 | 46.4 | 48.6  | 33.9 | 36.1  | 45.8   | 38.1 |       |        |             |      |
|        | AVG.( $e$ )      | 63.5 | 46.4 | 48.6  | 33.9 | 36.1  | 45.8   | 38.1 |       |        |             |      |
| LogicE | 1                | 46.0 | 33.8 | 32.1  | 23.3 | 22.8  | 25.6   | 26.2 | 35.6  |        |             |      |
|        | 2                | 51.2 | 35.9 | 39.0  | 30.6 | 30.5  | 36.9   | 32.7 |       |        |             |      |
|        | 3                | 64.5 | 48.6 | 49.8  | 35.4 | 37.5  | 47.7   | 39.6 |       |        |             |      |
|        | AVG.( $e$ )      | 54.9 | 41.7 | 42.3  | 32.8 | 33.4  | 40.4   |      |       |        |             |      |
| ConE   | 1                | 52.5 | 35.8 | 34.9  | 25.9 | 25.9  | 29.5   | 29.3 | 39.5  |        |             |      |
|        | 2                | 57.0 | 40.0 | 43.4  | 33.2 | 34.2  | 40.8   | 36.3 |       |        |             |      |
|        | 3                | 70.6 | 53.1 | 55.3  | 39.3 | 41.8  | 52.5   | 43.9 |       |        |             |      |
|        | AVG.( $e$ )      | 61.0 | 45.6 | 46.8  | 36.1 | 37.4  | 44.8   |      |       |        |             |      |
| CQD    | 1                | 74.6 | 36.1 | 32.7  | 17.6 | 16.7  | 25.4   | 23.7 | 37.2  |        |             |      |
|        | 2                | 52.2 | 35.2 | 40.9  | 29.2 | 31.5  | 39.2   | 33.2 |       |        |             |      |
|        | 3                | 53.3 | 32.4 | 33.1  | 21.7 | 21.6  | 37.4   | 24.8 |       |        |             |      |
|        | AVG.( $e$ )      | 59.4 | 41.5 | 44.6  | 33.3 | 35.3  | 43.3   |      |       |        |             |      |
| LMPNN  | 1                | 63.7 | 39.9 | 35.3  | 28.7 | 26.4  | 28.7   | 30.7 | 37.7  |        |             |      |
|        | 2                | 65.0 | 41.9 | 38.8  | 34.4 | 31.7  | 38.4   | 35.1 |       |        |             |      |
|        | 3                | 79.8 | 54.0 | 49.5  | 38.9 | 37.1  | 48.0   | 40.8 |       |        |             |      |
|        | AVG.( $e$ )      | 70.2 | 47.4 | 42.8  | 36.6 | 34.1  | 41.6   |      |       |        |             |      |

Table 7: MRR scores(%) for inferring queries with one free variable on NELL. The notation of  $e$ ,  $c$ , SDAG, Multi, Cyclic, AVG.( $c$ ) and AVG.( $e$ ) are the same as Table 1.

| Model  | $c \backslash e$ | 0    |      |       | 1    |       |        | 2    |       |        | AVG.( $c$ ) | AVG. |
|--------|------------------|------|------|-------|------|-------|--------|------|-------|--------|-------------|------|
|        |                  | SDAG | SDAG | Multi | SDAG | Multi | Cyclic | SDAG | Multi | Cyclic |             |      |
| BetaE  | 1                | 13.9 | 26.4 | 35.0  | 8.6  | 14.9  | 19.1   | 17.5 | 33.6  |        |             |      |
|        | 2                | 58.8 | 31.5 | 43.8  | 22.4 | 30.6  | 34.7   | 30.7 |       |        |             |      |
|        | 3                | 78.8 | 48.6 | 58.3  | 29.6 | 39.0  | 47.0   | 39.5 |       |        |             |      |
|        | AVG.( $e$ )      | 53.1 | 38.5 | 48.3  | 25.2 | 33.3  | 38.2   |      |       |        |             |      |
| LogicE | 1                | 18.3 | 29.2 | 39.6  | 12.1 | 19.0  | 20.4   | 21.1 | 36.9  |        |             |      |
|        | 2                | 63.5 | 34.4 | 47.3  | 26.4 | 34.0  | 37.6   | 34.2 |       |        |             |      |
|        | 3                | 79.6 | 51.2 | 59.3  | 33.1 | 42.2  | 50.1   | 42.6 |       |        |             |      |
|        | AVG.( $e$ )      | 56.3 | 41.3 | 50.9  | 28.8 | 36.7  | 41.0   |      |       |        |             |      |
| ConE   | 1                | 16.7 | 26.9 | 36.6  | 11.1 | 16.9  | 22.3   | 19.6 | 36.6  |        |             |      |
|        | 2                | 60.5 | 33.6 | 46.6  | 25.3 | 33.1  | 40.1   | 33.6 |       |        |             |      |
|        | 3                | 79.9 | 50.6 | 59.2  | 33.2 | 42.2  | 52.6   | 42.8 |       |        |             |      |
|        | AVG.( $e$ )      | 54.9 | 40.3 | 50.0  | 28.4 | 36.2  | 43.4   |      |       |        |             |      |
| CQD    | 1                | 22.3 | 30.6 | 37.3  | 13.3 | 17.9  | 20.7   | 20.9 | 38.2  |        |             |      |
|        | 2                | 59.8 | 34.0 | 45.2  | 28.8 | 35.4  | 38.9   | 35.3 |       |        |             |      |
|        | 3                | 62.7 | 48.8 | 59.9  | 36.4 | 44.1  | 52.6   | 44.3 |       |        |             |      |
|        | AVG.( $e$ )      | 50.1 | 40.2 | 49.9  | 31.6 | 38.1  | 42.7   |      |       |        |             |      |
| LMPNN  | 1                | 20.7 | 29.8 | 33.3  | 13.4 | 16.5  | 21.8   | 19.8 | 35.1  |        |             |      |
|        | 2                | 63.5 | 35.4 | 43.3  | 27.0 | 30.2  | 37.6   | 32.3 |       |        |             |      |
|        | 3                | 80.8 | 50.7 | 56.0  | 33.6 | 39.2  | 47.6   | 40.7 |       |        |             |      |
|        | AVG.( $e$ )      | 57.4 | 41.5 | 46.7  | 29.4 | 33.6  | 40.0   |      |       |        |             |      |

Table 8: HIT@10 scores(%) of three different types for answering queries with two free variables on FB15k. The constant number is fixed to be two. The notation of  $e$ , SDAG, Multi, and Cyclic is the same as Table 2.

| Model  | HIT@10 Type | $e = 0$ |       | $e = 1$ |       |        | $e = 2$ |       |        | AVG. |
|--------|-------------|---------|-------|---------|-------|--------|---------|-------|--------|------|
|        |             | SDAG    | Multi | SDAG    | Multi | Cyclic | SDAG    | Multi | Cyclic |      |
| BetaE  | Marginal    | 76.9    | 77.2  | 68.9    | 69.3  | 75.1   | 55.0    | 57.4  | 73.6   | 63.6 |
|        | Multiply    | 41.7    | 41.6  | 31.7    | 31.0  | 38.7   | 25.2    | 25.9  | 36.1   | 29.7 |
|        | Joint       | 11.6    | 13.7  | 8.7     | 8.6   | 17.8   | 4.9     | 5.4   | 14.3   | 8.4  |
| LogicE | Marginal    | 82.9    | 80.9  | 73.6    | 72.9  | 76.6   | 58.9    | 60.7  | 75.7   | 66.9 |
|        | Multiply    | 47.5    | 45.0  | 36.3    | 34.1  | 40.4   | 28.5    | 29.0  | 38.0   | 32.7 |
|        | Joint       | 12.7    | 13.9  | 10.0    | 9.9   | 19.2   | 6.1     | 6.5   | 15.9   | 9.6  |
| ConE   | Marginal    | 84.1    | 84.8  | 76.5    | 76.3  | 81.4   | 61.8    | 63.8  | 79.7   | 70.2 |
|        | Multiply    | 48.7    | 48.1  | 37.7    | 35.9  | 44.2   | 29.9    | 30.4  | 41.4   | 34.6 |
|        | Joint       | 14.2    | 15.6  | 10.3    | 10.4  | 20.6   | 6.2     | 6.6   | 16.9   | 10.1 |
| CQD    | Marginal    | 73.8    | 76.8  | 69.0    | 71.9  | 76.3   | 51.1    | 54.4  | 77.0   | 62.9 |
|        | Multiply    | 45.0    | 46.6  | 37.4    | 36.9  | 43.9   | 28.1    | 29.2  | 41.9   | 34.0 |
|        | Joint       | 17.1    | 19.0  | 13.1    | 13.0  | 20.6   | 7.7     | 8.6   | 18.1   | 11.9 |
| LMPNN  | Marginal    | 89.2    | 80.1  | 80.3    | 78.2  | 84.2   | 65.6    | 63.7  | 80.2   | 71.3 |
|        | Multiply    | 56.6    | 50.5  | 45.7    | 42.4  | 49.0   | 37.6    | 34.8  | 44.6   | 39.7 |
|        | Joint       | 18.9    | 17.2  | 12.9    | 12.4  | 22.4   | 8.0     | 7.5   | 16.9   | 11.2 |

Table 9: HIT@10 scores(%) of three different types for answering queries with two free variables on NELL. The constant number is fixed to be two. The notation of  $e$ , SDAG, Multi, and Cyclic is the same as Table 2.

| Model  | HIT@10 Type | $e = 0$ |       | $e = 1$ |       |        | $e = 2$ |       |        | AVG. |
|--------|-------------|---------|-------|---------|-------|--------|---------|-------|--------|------|
|        |             | SDAG    | Multi | SDAG    | Multi | Cyclic | SDAG    | Multi | Cyclic |      |
| BetaE  | Marginal    | 81.3    | 95.9  | 72.8    | 85.5  | 79.9   | 57.2    | 66.7  | 77.0   | 71.2 |
|        | Multiply    | 48.2    | 56.7  | 41.3    | 46.1  | 47.6   | 33.1    | 36.5  | 42.9   | 39.6 |
|        | Joint       | 19.2    | 31.8  | 21.2    | 26.5  | 21.7   | 13.8    | 17.5  | 18.5   | 18.8 |
| LogicE | Marginal    | 87.1    | 99.8  | 81.0    | 91.8  | 83.2   | 65.7    | 74.0  | 81.0   | 77.7 |
|        | Multiply    | 52.5    | 60.3  | 47.6    | 51.7  | 50.2   | 39.4    | 42.6  | 46.0   | 44.8 |
|        | Joint       | 21.1    | 32.8  | 25.4    | 30.5  | 23.3   | 18.0    | 21.5  | 20.5   | 22.3 |
| ConE   | Marginal    | 82.6    | 96.4  | 76.0    | 87.8  | 88.1   | 60.0    | 69.3  | 83.0   | 74.7 |
|        | Multiply    | 48.7    | 56.9  | 41.9    | 46.3  | 52.2   | 34.5    | 38.1  | 47.7   | 41.7 |
|        | Joint       | 17.0    | 30.9  | 19.3    | 25.0  | 24.9   | 12.9    | 17.2  | 20.3   | 18.8 |
| CQD    | Marginal    | 79.5    | 96.3  | 83.2    | 92.2  | 83.5   | 65.8    | 75.7  | 84.8   | 79.4 |
|        | Multiply    | 49.2    | 57.8  | 51.1    | 53.1  | 51.4   | 40.6    | 45.1  | 50.6   | 47.4 |
|        | Joint       | 23.0    | 38.0  | 29.7    | 34.2  | 26.4   | 21.4    | 25.4  | 24.0   | 26.0 |
| LMPNN  | Marginal    | 88.5    | 96.6  | 81.5    | 90.9  | 85.3   | 65.0    | 70.7  | 83.1   | 76.7 |
|        | Multiply    | 55.7    | 62.4  | 50.3    | 53.3  | 54.0   | 40.8    | 42.6  | 50.3   | 46.5 |
|        | Joint       | 23.4    | 36.4  | 25.5    | 29.4  | 24.0   | 16.6    | 19.7  | 21.5   | 21.5 |

Table 10: HIT@10 scores(%) of three different types for answering queries with two free variables on FB15k-237. The constant number is fixed to be one. The notation of  $e$ , SDAG, Multi, and Cyclic is the same as Table 2.

| Model  | HIT@10 Type | $e = 0$ |       | $e = 1$ |       |        | $e = 2$ |       |        | AVG. |
|--------|-------------|---------|-------|---------|-------|--------|---------|-------|--------|------|
|        |             | SDAG    | Multi | SDAG    | Multi | Cyclic | SDAG    | Multi | Cyclic |      |
| BetaE  | Marginal    | 37.5    | 29.7  | 33.4    | 28.1  | 35.6   | 30.0    | 25.9  | 41.2   | 31.2 |
|        | Multiply    | 18.9    | 13.7  | 15.3    | 10.3  | 15.2   | 17.7    | 13.3  | 17.2   | 14.3 |
|        | Joint       | 0.9     | 1.1   | 1.4     | 0.9   | 3.3    | 1.1     | 0.9   | 3.9    | 1.7  |
| LogicE | Marginal    | 40.6    | 30.7  | 36.0    | 29.1  | 34.6   | 29.8    | 25.3  | 41.5   | 31.4 |
|        | Multiply    | 21.1    | 14.3  | 17.2    | 10.9  | 16.3   | 17.8    | 13.3  | 17.5   | 14.7 |
|        | Joint       | 1.4     | 1.4   | 1.6     | 0.9   | 3.7    | 1.4     | 1.0   | 4.3    | 1.9  |
| ConE   | Marginal    | 40.8    | 32.4  | 37.3    | 30.4  | 40.7   | 31.1    | 26.9  | 45.0   | 33.5 |
|        | Multiply    | 22.1    | 15.2  | 18.4    | 11.7  | 19.3   | 18.5    | 14.8  | 20.9   | 16.5 |
|        | Joint       | 1.4     | 1.0   | 1.7     | 1.0   | 4.3    | 1.4     | 1.0   | 4.4    | 2.0  |
| CQD    | Marginal    | 73.8    | 76.8  | 69.0    | 71.9  | 76.3   | 51.1    | 54.4  | 77.0   | 62.9 |
|        | Multiply    | 23.3    | 9.1   | 18.5    | 9.2   | 16.2   | 14.6    | 9.2   | 19.1   | 12.9 |
|        | Joint       | 1.5     | 0.6   | 2.0     | 1.1   | 3.4    | 1.5     | 0.9   | 4.4    | 1.9  |
| LMPNN  | Marginal    | 39.0    | 27.6  | 40.0    | 29.5  | 39.3   | 30.6    | 24.8  | 42.7   | 32.0 |
|        | Multiply    | 25.1    | 13.9  | 24.3    | 13.3  | 21.6   | 20.0    | 14.0  | 21.1   | 17.1 |
|        | Joint       | 1.6     | 1.3   | 2.5     | 1.3   | 3.9    | 1.5     | 1.0   | 4.0    | 2.0  |

Table 11: HIT@10 scores(%) of two different types for answering queries with two free variables on FB15k-237(including queries without the marginal hard answer). The constant number is fixed to be two. The notation of  $e$ , SDAG, Multi, and Cyclic is the same as Table 2.

| Model  | HIT@10 Type | $e = 0$ |       | $e = 1$ |       |        | $e = 2$ |       |        | AVG. |
|--------|-------------|---------|-------|---------|-------|--------|---------|-------|--------|------|
|        |             | SDAG    | Multi | SDAG    | Multi | Cyclic | SDAG    | Multi | Cyclic |      |
| BetaE  | Multiply    | 29.1    | 29.1  | 18.3    | 37.5  | 10.4   | 28.0    | 93.6  | 74.6   | 24.1 |
|        | Joint       | 2.1     | 2.2   | 1.7     | 3.0   | 2.4    | 1.8     | 5.8   | 14.2   | 4.6  |
| LogicE | Multiply    | 31.6    | 32.9  | 19.8    | 39.6  | 10.9   | 28.7    | 96.3  | 73.8   | 25.4 |
|        | Joint       | 2.6     | 2.5   | 2.1     | 3.1   | 2.5    | 2.2     | 6.4   | 15.6   | 5.0  |
| ConE   | Multiply    | 32.6    | 31.9  | 20.5    | 41.0  | 12.6   | 29.0    | 99.7  | 86.8   | 27.0 |
|        | Joint       | 3.0     | 2.1   | 1.9     | 3.3   | 2.7    | 2.2     | 6.6   | 16.8   | 5.4  |
| CQD    | Multiply    | 34.5    | 23.4  | 22.3    | 36.8  | 10.6   | 26.4    | 75.3  | 77.3   | 25.6 |
|        | Joint       | 2.9     | 1.4   | 2.1     | 3.3   | 2.3    | 2.0     | 5.0   | 15.0   | 5.6  |
| LMPNN  | Multiply    | 36.8    | 29.3  | 27.5    | 45.8  | 13.9   | 31.2    | 97.0  | 86.5   | 27.9 |
|        | Joint       | 2.7     | 2.2   | 2.7     | 3.9   | 2.5    | 2.1     | 5.8   | 14.6   | 5.0  |
| FIT    | Multiply    | 41.5    | 44.4  | 28.9    | 56.8  | 10.2   | 39.4    | 139.7 | 100.3  | 35.0 |
|        | Joint       | 2.4     | 2.3   | 2.1     | 3.4   | 1.6    | 2.2     | 7.4   | 15.4   | 5.9  |



Table 12: HIT@10 scores(%) of two different types for answering queries with two free variables on FB15k(including queries without the marginal hard answer). The constant number is fixed to be two. The notation of  $e$ , SDAG, Multi, and Cyclic is the same as Table 2.

| Model  | HIT@10 Type | $e = 0$ |       | $e = 1$ |       |        | $e = 2$ |       |        | AVG. |
|--------|-------------|---------|-------|---------|-------|--------|---------|-------|--------|------|
|        |             | SDAG    | Multi | SDAG    | Multi | Cyclic | SDAG    | Multi | Cyclic |      |
| BetaE  | Multiply    | 42.1    | 57.2  | 26.5    | 66.5  | 15.5   | 34.6    | 134.9 | 100.0  | 35.0 |
|        | Joint       | 6.6     | 9.4   | 4.5     | 10.2  | 4.6    | 4.3     | 16.7  | 26.0   | 9.2  |
| LogicE | Multiply    | 48.2    | 65.6  | 31.0    | 71.6  | 16.8   | 37.8    | 143.9 | 105.8  | 38.1 |
|        | Joint       | 7.5     | 11.2  | 5.6     | 12.5  | 5.3    | 5.6     | 20.4  | 28.5   | 10.5 |
| ConE   | Multiply    | 50.2    | 72.2  | 32.8    | 74.6  | 18.3   | 38.3    | 149.3 | 114.3  | 40.4 |
|        | Joint       | 6.8     | 10.0  | 5.2     | 12.5  | 5.5    | 5.2     | 19.4  | 30.4   | 11.0 |
| CQD    | Multiply    | 48.1    | 55.9  | 31.9    | 69.0  | 15.8   | 29.5    | 93.5  | 103.2  | 37.6 |
|        | Joint       | 9.4     | 11.4  | 6.6     | 14.8  | 4.8    | 5.5     | 17.5  | 27.2   | 12.0 |
| LMPNN  | Multiply    | 58.4    | 79.5  | 43.1    | 94.6  | 21.3   | 40.9    | 146.2 | 135.9  | 45.0 |
|        | Joint       | 8.6     | 12.9  | 6.8     | 15.6  | 6.2    | 5.4     | 19.3  | 31.7   | 11.6 |

Table 13: HIT@10 scores(%) of two different types for answering queries with two free variables on NELL(including queries without the marginal hard answer). The constant number is fixed to be two. The notation of  $e$ , SDAG, Multi, and Cyclic is the same as Table 2.

| Model  | HIT@10 Type | $e = 0$ |       | $e = 1$ |       |        | $e = 2$ |       |        | AVG. |
|--------|-------------|---------|-------|---------|-------|--------|---------|-------|--------|------|
|        |             | SDAG    | Multi | SDAG    | Multi | Cyclic | SDAG    | Multi | Cyclic |      |
| BetaE  | Multiply    | 21.2    | 47.3  | 22.0    | 51.9  | 14.7   | 24.1    | 80.5  | 79.7   | 33.4 |
|        | Joint       | 4.2     | 19.6  | 6.8     | 19.1  | 5.1    | 6.8     | 26.7  | 24.0   | 14.1 |
| LogicE | Multiply    | 26.6    | 52.8  | 28.8    | 63.4  | 16.0   | 32.8    | 103.1 | 88.5   | 38.9 |
|        | Joint       | 3.8     | 21.5  | 9.7     | 26.0  | 5.9    | 11.5    | 36.9  | 27.3   | 16.5 |
| ConE   | Multiply    | 25.3    | 51.4  | 23.9    | 53.9  | 16.9   | 27.3    | 90.7  | 90.6   | 36.7 |
|        | Joint       | 3.4     | 20.2  | 6.4     | 17.0  | 6.1    | 7.2     | 27.0  | 27.1   | 14.2 |
| CQD    | Multiply    | 30.3    | 48.9  | 30.6    | 64.3  | 15.9   | 33.1    | 88.9  | 91.2   | 40.9 |
|        | Joint       | 4.4     | 21.9  | 9.8     | 27.5  | 5.6    | 12.0    | 37.6  | 28.1   | 18.0 |
| LMPNN  | Multiply    | 33.4    | 58.3  | 33.7    | 65.3  | 19.4   | 30.7    | 85.1  | 105.0  | 41.8 |
|        | Joint       | 4.4     | 23.7  | 10.0    | 21.9  | 5.8    | 8.2     | 23.2  | 28.8   | 15.7 |
